# Supplementary material for: Functional modified separator with high-entropy material for high-performance Zn–I 2 batteries
Source: Royal Society of Chemistry journal article supplement (doi:10.1039/d4qi03244f), 2025-01-01
Supplement: d4qi03244f1.pdf [file d4qi03244f1.pdf]

## 1 **Supporting Information for**

2 Functional modified separator with high-entropy material for high performance Zn-I<sub>2</sub>  
3 batteries

4 Hongfeng Jia<sup>a</sup>, Yanxin Li<sup>a</sup>, Yuehan Hao<sup>a</sup>, Xinyuan Hu<sup>a</sup>, Usman Ali<sup>a</sup>, Bingqiu Liu<sup>a</sup>, Lu  
5 Li<sup>a</sup>, Lingyu Zhang<sup>a\*</sup>, Sun Hang<sup>b</sup>, and Chungang Wang<sup>a\*</sup>

6 <sup>a</sup> Department of Chemistry, Northeast Normal University, 5268 Renmin Street,  
7 Changchun, Jilin 130024, P. R. China

8 <sup>b</sup> Jilin Institute of Metrology Science-Jilin Key Laboratory of Metrology and Testing  
9 Instruments and Technology, No. 2699 Yiju Road, Changchun, Jilin 130024, P. R.  
10 China

11 \*Corresponding author. E-mail: [zhaoliang@nenu.edu.cn](mailto:zhaoliang@nenu.edu.cn); [wangcg925@nenu.edu.cn](mailto:wangcg925@nenu.edu.cn)

12

## 1 **Experimental section**

### 2 ***Materials:***

3 Ytterbium (III) chloride hexahydrate ( $\text{YbCl}_3 \cdot 6\text{H}_2\text{O}$ , 99.99%), yttrium (III) chloride  
4 hexahydrate ( $\text{YCl}_3 \cdot 6\text{H}_2\text{O}$ , 99.99%), indium chloride hydrate ( $\text{InCl}_3 \cdot 6\text{H}_2\text{O}$ , 99.99%),  
5 thulium chloride hexahydrate ( $\text{TmCl}_3 \cdot 6\text{H}_2\text{O}$ , 99.99%), and Zn foils (99.99%) were  
6 obtained from Energy Chemical. Zirconium (IV) chloride ( $\text{ZrCl}_4$ , 99.5%) was bought  
7 from Strem Chemicals, Inc. Zinc sulfate was purchased from Sigma-Aldrich. All  
8 reagents were used directly without further purification. Deionized (DI) water was  
9 thoroughly used during the experiment.

### 10 ***Preparation of CNFs/HEO:***

11 Equivalent stoichiometric amounts of  $\text{YbCl}_3 \cdot 6\text{H}_2\text{O}$ ,  $\text{YCl}_3 \cdot 6\text{H}_2\text{O}$ ,  $\text{InCl}_3 \cdot 6\text{H}_2\text{O}$ ,  
12  $\text{TmCl}_3 \cdot 6\text{H}_2\text{O}$ , and  $\text{ZrCl}_4$  were dissolved in 7 mL DMF in turn. Subsequently, 500 mg  
13 PAN was added, and the mixture was stirred at 50°C for 10 h to make sure the complete  
14 dissolution of each component. Electrospinning was conducted by TEADFS-100  
15 (Beijing Technova Technology Co., Ltd.). The flow rate of the spinning solution was  
16 0.013 mL/min and collected by aluminum foil fixed on a grounded steel drum. The as-  
17 prepared fibers were placed in an oven at 80 °C for 12 h until DMF was completely  
18 removed. The fibers were first stabilized at 220°C for 2 h and then heated to 900°C for  
19 2 h with a heating rate of 2°C/min in an Ar atmosphere. The as-prepared material was  
20 named as CNFs/HEO.

### 21 ***Preparation of CNFs/ $\text{Yb}_2\text{O}_3$ :***

22 1.5 mmol  $\text{YbCl}_3 \cdot 6\text{H}_2\text{O}$  was added to 7 mL DMF with continuous stirring. After

1 complete dissolution, 500 mg PAN was added. The mixed solution was stirred at 50°C  
2 for 10 h. The electrospinning procedure and parameter were identical to the  
3 CNFs/HEO.

#### 4 ***Synthesis of the cathode and battery Assembly:***

5 Firstly, activated carbon were mixed and ground in a mortar with iodine in a mass  
6 ratio of 1:1.2. Then, the mixture was transferred into a glass tube and thermally sealed.  
7 After heating at 120 °C for 6 h, the powder was collected and ground in a mortar with  
8 acetylene black, CMC, and SBR in a mass ratio of 7:2:0.5:0.5. Then, the mixture was  
9 applied to the carbon cloth. The cathode was dried in a vacuum oven at 30 °C for 6 h.  
10 The active material (I<sub>2</sub>) loading of the individual electrode was about 1.0-1.2 mg cm<sup>-2</sup>.  
11 CNFs/Yb<sub>2</sub>O<sub>3</sub> and CNFs/HEO were used as the cathode-modified interface and  
12 assembled between the cathode and the separator. 120 μL of 2 M ZnSO<sub>4</sub> was selected  
13 as an electrolyte.

#### 14 ***Electrochemical measurements:***

15 The electrochemical impedance spectroscopy (EIS) was collected over the frequency  
16 range from 100 kHz to 0.1 Hz. Cyclic voltammetry (CV) was tested on the CHI760E  
17 electrochemical workstation with a voltage range between 0.6 and 1.6 V at a scan rate  
18 of 0.5 mV s<sup>-1</sup>. The discharge-charge cycling of Zn-I<sub>2</sub> was measured on the Neware  
19 battery test system (CT-ZWJ-4'S-T-1U, Shenzhen, China) and LAND battery test  
20 instrument (CT2001A, LAND, China) within a voltage range of 0.6-1.6 V.

#### 21 ***Materials characterization:***

22 X-ray powder diffraction (XRD) analysis was obtained on a D8 Focus diffractometer

1 (Bruker) with Cu-K $\alpha$  radiation ( $\lambda=0.15405$  nm) from Rigaku Corporation in Japan.  
2 High-resolution transmission electron microscope (HR-TEM) characterizations were  
3 taken by JEOLJEM-2100F transmission electron microscope at 200 kV accelerating  
4 voltage. Scanning electron microscopy (SEM) images were measured by HITACHI  
5 SU8010 field-emission scanning electron microscope (FEI Co.) with an energy-  
6 dispersive X-ray spectrum (EDS) from the Hitachi Limited in Japan. Raman spectrum  
7 was recorded at room temperature with a JY HR-800 LabRam confocal Raman  
8 microscope in a backscattering configuration with an excitation wavelength of 488 nm.  
9 X-ray photoelectron spectrum (XPS) was tested on an ECSALAB 250 using non-  
10 monochromatized Al-K $\alpha$  radiation. An atom force microscope (AFM) was performed  
11 on Asylum Research Cypher ES.

## 12 *DFT calculations:*

13 First-principles calculations are performed in the framework of Density Functional  
14 Theory (DFT), which is implemented in the Vienna Ab initio simulation package  
15 (VASP)<sup>1,2</sup>. The projector augmented wave (PAW)<sup>3</sup> potential was used with a plane-  
16 wave cutoff energy of 500 eV. Conjugate gradient method was used for geometric  
17 optimization, with the convergence threshold set at  $10^{-6}$  eV per atom in energy and 0.01  
18 eV $\cdot\text{\AA}^{-1}$  in force. A vacuum distance of  $>15$   $\text{\AA}$  was employed to avoid interactions of  
19 neighboring images. The DFT-D3 method including vdW is used to deal with the inter-  
20 layer van der Waals forces<sup>4</sup>. Considering the strong correlation of transition metals, the  
21 density of states (DOS) was calculated by the GGA+U method<sup>5</sup>.

22

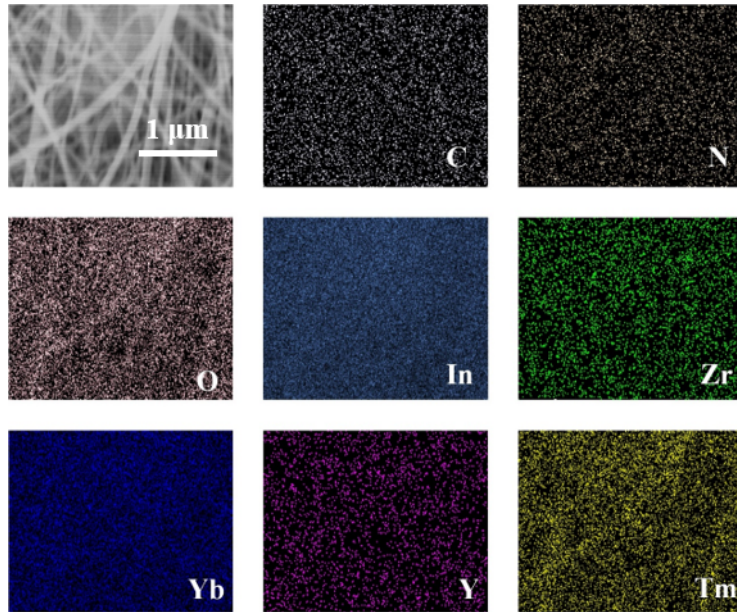

1

2 Fig. S1 SEM images and corresponding mapping analysis of CNFs/HEO.

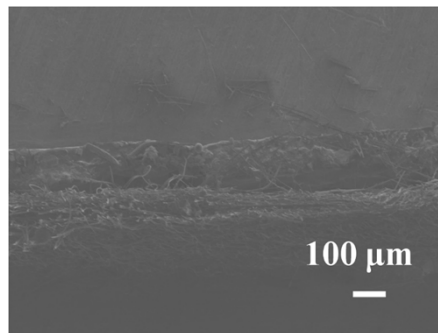

3

4 Fig. S2 Cross-section SEM image of CNFs/HEO.

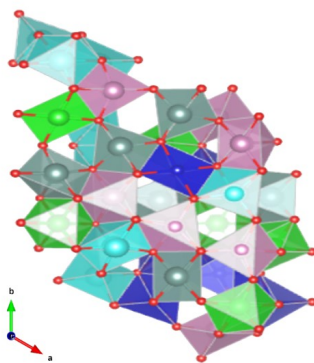

5

6 Fig. S3 Crystal structure of HEO.

7

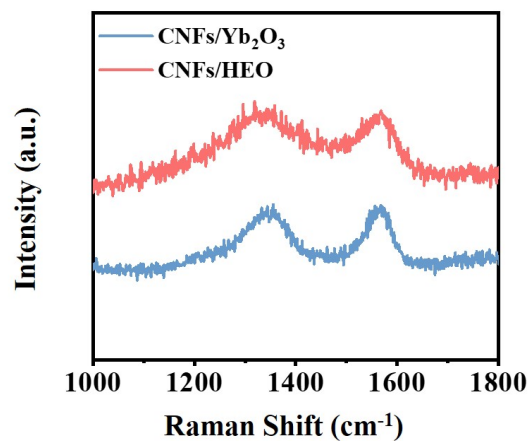

1

2 Fig. S4 Raman spectra of CNFs/Yb<sub>2</sub>O<sub>3</sub> and CNFs/HEO.

3

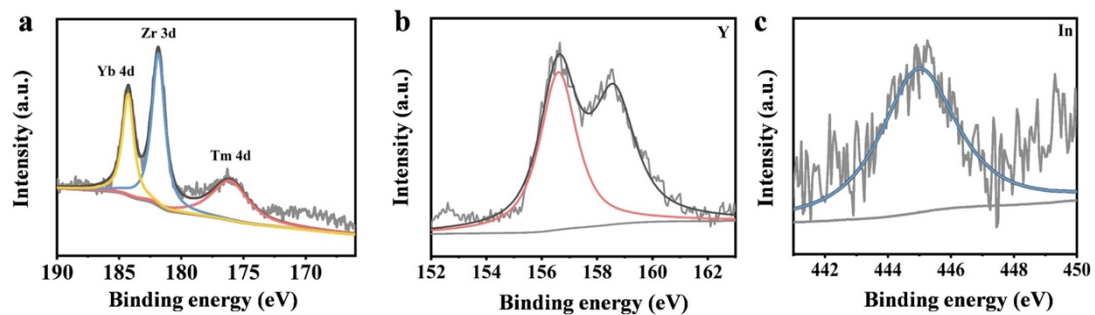

4

5 Fig. S5 XPS spectra of (a) Yb, Zr, and Tm, (b) Y, and (c) In in CNFs/HEO.

6

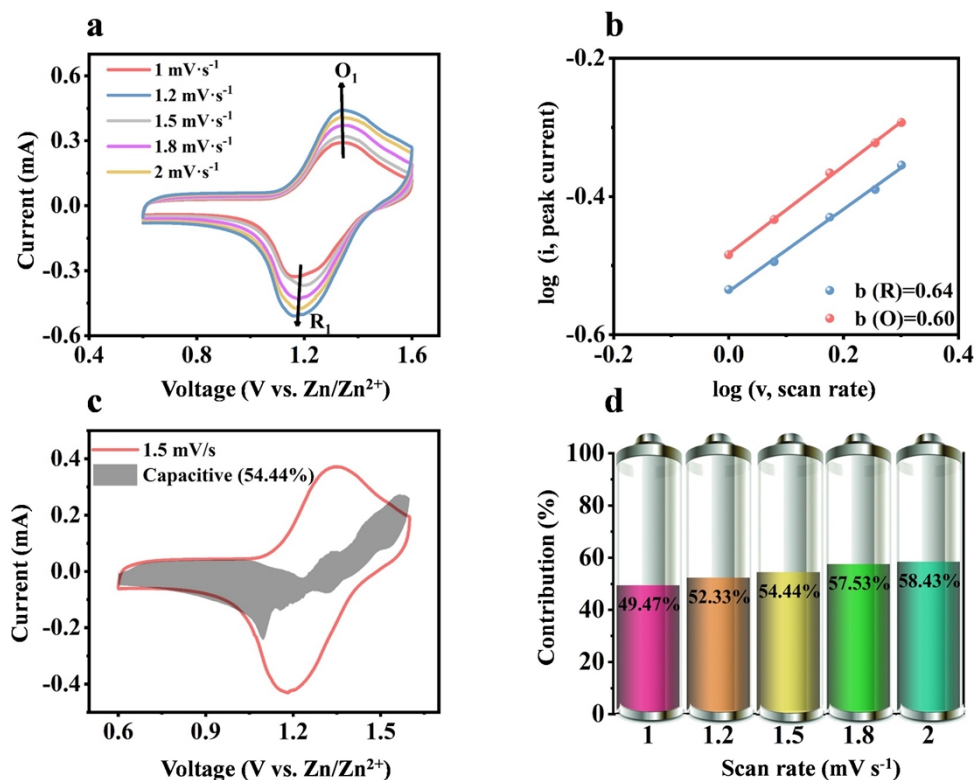

1

2 Fig. S6 (a) CV curves at different scan rates, (b) Log (i) -log (v) plots for specific peak  
 3 current, (c) Capacitive contribution at 1.5 mV s<sup>-1</sup>, and (d) Capacitive and diffusion  
 4 contribution versus scan rate curve of CNFs/Yb<sub>2</sub>O<sub>3</sub>.

5 Generally speaking, the peak current (i) and scan rate (v) maintain a functional  
 6 relationship as follows:

$$7 \quad i = av^b \quad (1)$$

8 where a and b represent arbitrary coefficients<sup>6,7</sup>. When the b value is close to 0.5, the  
 9 electrochemical kinetics is denoted by the diffusion process caused by zinc ion (de)-  
 10 intercalation. When b is closer to 1.0, it demonstrates that a surface redox reaction  
 11 dominates the capacitive behavior. While the value of b is between 0.5 and 1.0, it means  
 12 the electrochemical kinetics is determined by both the diffusion process of Zn<sup>2+</sup> and the  
 13 capacitive behavior. Additionally, according to

$$i = k_1v + k_2v^{1/2} \quad (2)$$

the specific contributions of the capacitive behavior ( $k_1v$ ) and the diffusion-controlled insertion ( $k_2v^{1/2}$ ) at different scan rates were calculated<sup>8,9</sup>.

4

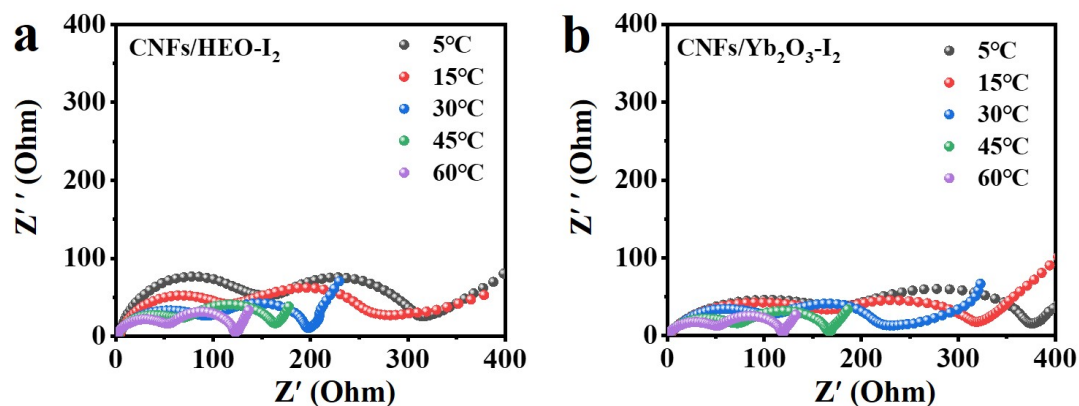

5

6 Fig. S7 Arrhenius activation energy ( $E_a$ ) of (a) CNFs/HEO and (b) CNFs/Yb<sub>2</sub>O<sub>3</sub>  
7 batteries.

8  $E_a$  of the I<sub>2</sub> reduction process can be calculated according to the following Arrhenius  
9 equation:

$$1/R_{ct} = A \exp(-E_a / RT)$$

11 Where  $R_{ct}$ ,  $A$ ,  $R$ , and  $T$  represent the charge-transfer resistance, frequency factor, gas  
12 constant, and absolute temperature, respectively. EIS profiles of the four electrodes at  
13 different temperatures from 5 to 60 °C were tested.



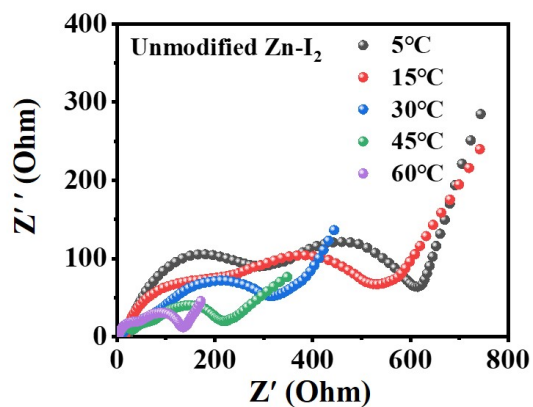

1

2 Fig. S8 Arrhenius activation energy ( $E_a$ ) of unmodified Zn-I<sub>2</sub> batteries.

3

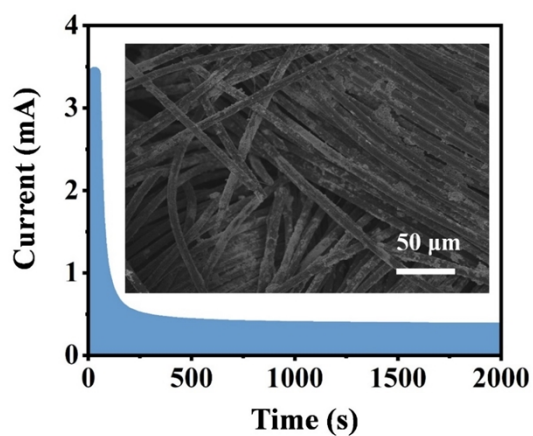

4

5 Fig. S9 Potentiostatic deposition curves of I<sub>2</sub> on the cathode with CNFs/Yb<sub>2</sub>O<sub>3</sub> (The  
6 inset reflects the surface state after iodine deposition).

7

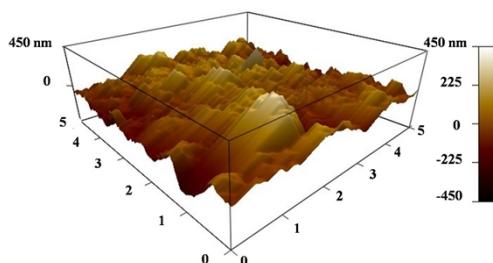

8

9 Fig. S10 AFM image of the cathode with CNFs/Yb<sub>2</sub>O<sub>3</sub> modified layer after depositing  
10 I<sub>2</sub>.

1

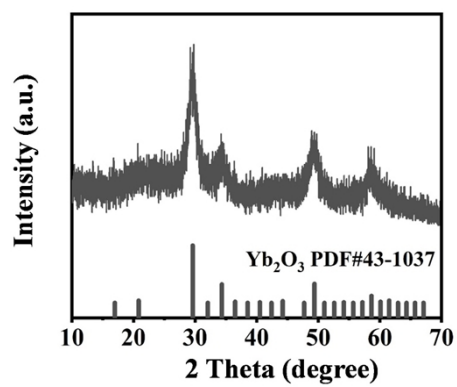

2

3 Fig. S11 XRD pattern of CNFs/HEO after cycling 1000 cycles.

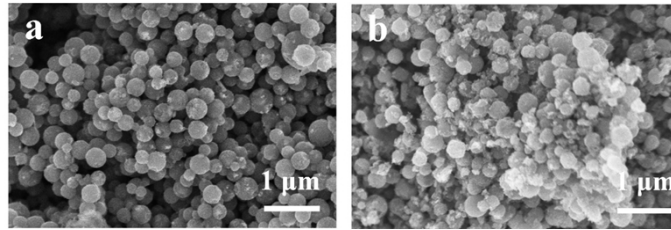

1

2 Fig. S12 SEM images of (a) OMMC NSs and (b) OMMC-I<sub>2</sub> NSs.

3

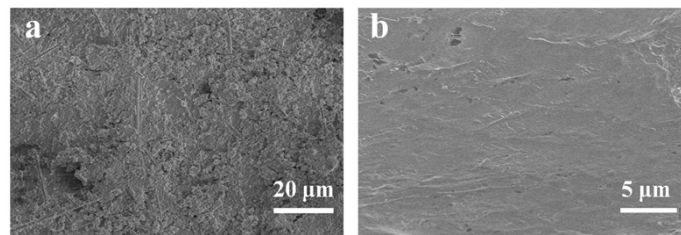

4

5 Fig. S13 SEM images of the zinc anodes after cycling in the (a) CNFs/Yb<sub>2</sub>O<sub>3</sub> and (b)

6 CNFs/HEO batteries.

7

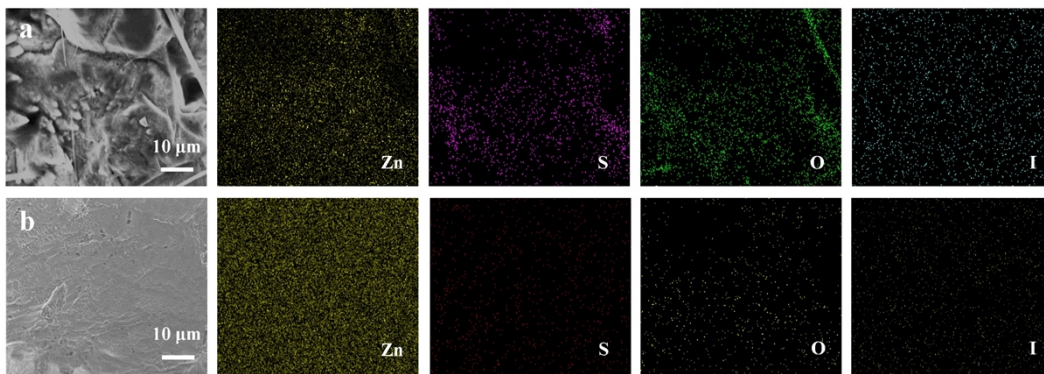

8

9 Fig. S14 SEM images and corresponding mapping analysis of the zinc anodes after

10 cycling in the (a) CNFs/Yb<sub>2</sub>O<sub>3</sub> and (b) CNFs/HEO batteries.

11

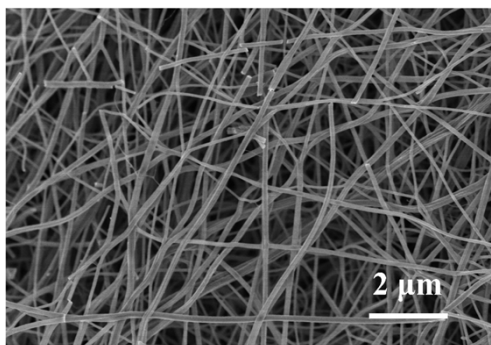

1

2 Fig. S15 SEM image of CNFs/HEO after cycling.

3

4 Table S1. The refined crystallographic data of HEO obtained from XRD Rietveld  
5 refinements.

| Sample | a (=b=c)/Å | Volume/Å <sup>3</sup> |
|--------|------------|-----------------------|
| HEO    | 10.41      | 1128.11               |

6

7

8 Table S2. Comparison of main parameters and cycling property for this work with  
9 previous works.

| Electrode | Current density (A g <sup>-1</sup> ) | Cycling life (h) | Capacity retention (%) | Ref |
|-----------|--------------------------------------|------------------|------------------------|-----|
| eIM       | 6                                    | 23000            | 80                     | 10  |
| NHPC      | 5                                    | 10000            | 90.6                   | 11  |

|                                                                           |           |              |             |                      |
|---------------------------------------------------------------------------|-----------|--------------|-------------|----------------------|
| PNC-1000                                                                  | 1         | 10000        | 89          | 12                   |
| I <sub>2</sub> @GP-CMT                                                    | 4         | 1000         | 88.8        | 13                   |
| NPCNFs-800                                                                | 2         | 6000         | 99.4        | 14                   |
| Co[Co <sub>1/4</sub> Fe <sub>3/4</sub> (CN) <sub>6</sub> ]/I <sub>2</sub> | 4         | 2000         | 80.2        | 15                   |
| I <sub>2</sub> /OSTC                                                      | 1         | 10000        | 85.0        | 16                   |
| <b>CNFs/HEO</b>                                                           | <b>10</b> | <b>30000</b> | <b>62.5</b> | <b>This<br/>work</b> |

1

## 2 References

- 3 1. G. Kresse and J. Furthmüller, Efficient iterative schemes for ab initio total-energy  
4 calculations using a plane-wave basis set, *Phys. Rev. B*, 1996, **54**, 11169-11186.
- 5 2. G. Kresse and J. Hafner, Ab initio molecular dynamics for open-shell transition  
6 metals, *Phys. Rev. B*, 1993, **48**, 13115-13118.
- 7 3. P. E. Blöchl, Projector augmented-wave method, *Phys. Rev. B*, 1994, **50**, 17953-  
8 17979.
- 9 4. S. Grimme, J. Antony, S. Ehrlich and H. Krieg, A consistent and accurate ab initio  
10 parametrization of density functional dispersion correction (DFT-D) for the 94  
11 elements H-Pu, *J. of Chem. Phys.*, 2010, **132**. <https://doi.org/10.1063/1.3382344>.
- 12 5. M. Liu, Z. Rong, R. Malik, P. Canepa, A. Jain, G. Ceder and K. A. Persson, Spinel  
13 compounds as multivalent battery cathodes: a systematic evaluation based on ab initio  
14 calculations, *Energy Environ. Sci.*, 2015, **8**, 964-974.
- 15 6. J. Wang, J. Polleux, J. Lim and B. Dunn, Pseudocapacitive contributions to  
16 electrochemical energy storage in TiO<sub>2</sub> (anatase) nanoparticles, *J. Phys. Chem. C*, 2007,  
17 **111**, 14925-14931.
- 18 7. V. Augustyn, J. Come, M. A. Lowe, J. W. Kim, P.-L. Taberna, S. H. Tolbert, H. D.  
19 Abruña, P. Simon and B. Dunn, High-rate electrochemical energy storage through Li<sup>+</sup>

1 intercalation pseudocapacitance, *Nat. Mater.*, 2013, **12**, 518-522.

2 8. F. Wan, L. Zhang, X. Dai, X. Wang, Z. Niu and J. Chen, Aqueous rechargeable  
3 zinc/sodium vanadate batteries with enhanced performance from simultaneous  
4 insertion of dual carriers, *Nat. Commun.*, 2018, **9**. [https://doi.org/10.1038/s41467-018-](https://doi.org/10.1038/s41467-018-04060-8)  
5 [04060-8](https://doi.org/10.1038/s41467-018-04060-8).

6 9. V. Augustyn, P. Simon and B. Dunn, Pseudocapacitive oxide materials for high-  
7 rate electrochemical energy storage, *Energy Environ. Sci.*, 2014, **7**, 1597-1614.

8 10. X. Li, N. Li, Z. Huang, Z. Chen, G. Liang, Q. Yang, M. Li, Y. Zhao, L. Ma, B.  
9 Dong, Q. Huang, J. Fan and C. Zhi, Enhanced redox kinetics and duration of aqueous  
10 I<sub>2</sub>/I<sup>-</sup> conversion chemistry by MXene confinement, *Adv. Mater.*, 2021, **33**, 2006897.

11 11. Z. Gong, C. Song, C. Bai, X. Zhao, Z. Luo, G. Qi, X. Liu, C. Wang, Y. Duan and  
12 Z. J. S. C. M. Yuan, Anchoring high-mass iodine to nanoporous carbon with large-  
13 volume micropores and rich pyridine-N sites for high-energy-density and long-life Zn-  
14 I<sub>2</sub> aqueous battery, *Sci. Chi. Mater.*, 2023, **66**, 556-566.

15 12. T. Liu, H. Wang, C. Lei, Y. Mao, H. Wang, X. He and X. J. E. S. M. Liang,  
16 Recognition of the catalytic activities of graphitic N for zinc-iodine batteries, *Energy*  
17 *Storage Mater.*, 2022, **53**, 544-551.

18 13. S. Chai, J. Yao, Y. Wang, J. Zhu and J. J. C. E. J. Jiang, Mediating iodine cathodes  
19 with robust directional halogen bond interactions for highly stable rechargeable Zn-I<sub>2</sub>  
20 batteries, *Chem. Eng. J.*, 2022, **439**, 135676.

21 14. Y. He, M. Liu, S. Chen and J. J. S. C. C. Zhang, Shapeable carbon fiber networks  
22 with hierarchical porous structure for high-performance Zn-I<sub>2</sub> batteries, *Sci. Chi.*  
23 *Chem.*, 2022, **65**, 391-398.

24 15. L. Ma, Y. Ying, S. Chen, Z. Huang, X. Li, H. Huang and C. Zhi, Electrocatalytic  
25 iodine reduction reaction enabled by aqueous zinc-iodine battery with improved power  
26 and energy densities, *Angew. Chem. Int. Ed.*, 2021, **60**, 3791-3798.

27 16. M. Chen, W. Zhu, H. Guo, Z. Tian, L. Zhang, J. Wang, T. Liu, F. Lai and J. J. E.  
28 S. M. Huang, Tightly confined iodine in surface-oxidized carbon matrix toward dual-  
29 mechanism zinc-iodine batteries, *Energy Storage Mater.*, 2023, **59**, 102760.

30
